# Supplementary material for: DEVELOPMENT-RELATED PcG TARGET IN THE APEX 4 controls leaf margin architecture in Arabidopsis thaliana
Source: Oxford University Press journal article supplement (doi:10.1242/dev.078618), 2012-06-06
Supplement: dev078618supptables3.pdf [file dev078618supptables3.pdf]

| Gene      | Functional prediction*                                                                                                                                                                                                                        | Confirmed function <sup>‡</sup>                                                         | CACCTG | Up/down <sup>§</sup> | FC    |
|-----------|-----------------------------------------------------------------------------------------------------------------------------------------------------------------------------------------------------------------------------------------------|-----------------------------------------------------------------------------------------|--------|----------------------|-------|
| At2g26010 | Predicted PR protein                                                                                                                                                                                                                          | None                                                                                    | Yes    | Up                   | -1.80 |
| At3g31902 | Pseudogene, MADS-box protein                                                                                                                                                                                                                  | None                                                                                    | Yes    | Up                   | -1.58 |
| At2g04395 | Telomere maintenance                                                                                                                                                                                                                          | None                                                                                    | Yes    | Up                   | -1.38 |
| At1g09995 | Best <i>Arabidopsis</i> protein match is: helicase related (At1g79890.1)                                                                                                                                                                      | None                                                                                    |        | Up                   | -1.11 |
| At3g23637 | Contains DVL domain (DVL21), shoot development                                                                                                                                                                                                | None                                                                                    |        | Up                   | -1.22 |
| At2g03445 | MIR398A                                                                                                                                                                                                                                       | Targets two Cu/Zn superoxide dismutases (CSD1 and CSD2) (Jagadeeswaran et al., 2009)    |        | Up                   | -1.27 |
| At1g61224 | MIR842A, targets several Jacalin lectin family members                                                                                                                                                                                        | None                                                                                    | Yes    | Down                 | 1.58  |
| At4g14811 | MIR780A, targets CATION/H+ EXCHANGER 18 (CHX18)                                                                                                                                                                                               | None                                                                                    | Yes    | Down                 | 1.25  |
| At4g09775 | Best <i>Arabidopsis</i> protein match is: reverse transcriptase-related (At2g02650.1)                                                                                                                                                         | None                                                                                    |        | Down                 | 1.28  |
| At5g02360 | Best <i>Arabidopsis</i> protein match is: DC1 domain-containing protein (At1g53340.1)                                                                                                                                                         | None                                                                                    |        | Down                 | 1.29  |
| At2g28755 | Best <i>Arabidopsis</i> protein match is: NAD-dependent epimerase/dehydratase family protein (At2g28760.3)                                                                                                                                    | None                                                                                    | Yes    | Down                 | 1.50  |
| At5g38378 | Encodes a plant thionin family protein                                                                                                                                                                                                        | None                                                                                    | Yes    | Down                 | 1.26  |
| At3g23680 | Best <i>Arabidopsis</i> protein match is: F-box family protein (At3g23685.1)                                                                                                                                                                  | None                                                                                    |        | Down                 | 1.12  |
| At5g33210 | SHI-RELATED SEQUENCE 8 (SRS8), a member of SHORT INTERNODE (SHI) gene family. <i>Arabidopsis thaliana</i> has ten members that encode proteins with a RING finger-like zinc-finger motif. SRS8 is a putative pseudo-gene (Kuusk et al., 2006) | None                                                                                    |        | Down                 | 1.30  |
| At4g02950 | Best <i>Arabidopsis</i> protein match is: ubiquitin protein (At4g03360.1)                                                                                                                                                                     | None                                                                                    | Yes    | Down                 | 1.35  |
| At3g01345 | Contains InterPro domain glycoside hydrolase                                                                                                                                                                                                  | None, downregulated in mutants of the SET domain protein SDG4 (Cartagena et al., 2008). |        | Down                 | 1.26  |
| At5g39290 | ARABIDOPSIS THALIANA EXPANSIN A26 (ATEXPA26)                                                                                                                                                                                                  | None                                                                                    |        | Down                 | 1.19  |
| At5g39540 | Best <i>Arabidopsis</i> protein match is: anac063 (Arabidopsis NAC (NAM/ATAF1, 2/CUC2) domain 63)                                                                                                                                             | None                                                                                    |        | Down                 | 1.40  |

\*Function predicted by sequence similarity.

<sup>‡</sup>Function confirmed by direct assay.

<sup>§</sup>Gene is up- or downregulated in *dpa4*.
